# Supplementary material for: Naturally Segregating Variation at Ugt86Dd Contributes to Nicotine Resistance in Drosophila melanogaster
Source: PubMed Central journal article supplement (PMC5586381; doi:10.1534/genetics.117.300058), 2017-07-26

**Figure S2** Results of quantitative complementation tests. We carried out tests using a series of deficiencies and insertional mutants. The “Interaction” *P*-value presented assesses the significance of the Founder × Mutant interaction, determining whether there is a significant quantitative failure to complement. Information regarding the positions of deficiencies/insertions is reported based on Release 6 of the *Drosophila melanogaster* reference genome. Information regarding the genes deleted was taken from FlyBase on March 11, 2017.

2L Deficiencies

BDSC: 7497  
 Exelixis Deficiency  
 w<sup>1118</sup>; Df(2L)Exel6011/CyO

Deletes: 2L:5,147,258..5,305,646  
 13 protein-coding genes including:  
*Cyp28d1*, *Cyp28d2*, *Cyp4ac1*,  
*Cyp4ac2*, and *Cyp4ac3*

Interaction:  $P < 10^{-9}$

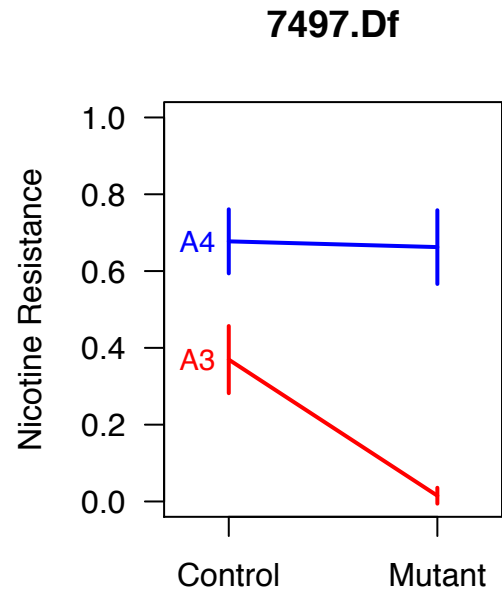

BDSC: 26545  
 BSC Deficiency  
 w<sup>1118</sup>; Df(2L)BSC693/SM6a

Deletes: 2L:5,209,495..5,305,646  
 11 protein-coding genes including:  
*Cyp28d1*, *Cyp4ac1*, *Cyp4ac2*,  
 and *Cyp4ac3*

Interaction:  $P < 10^{-10}$

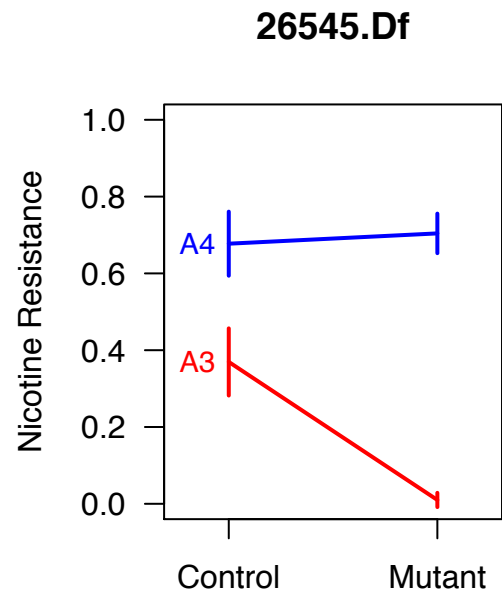

### 3R Deficiencies

BDSC: 7957  
Exelixis Deficiency  
*w<sup>1118</sup>*; Df(3R)Exel7306/TM6B, Tb<sup>1</sup>

Deletes: 3R:10,871,007..11,156,829  
18 protein-coding genes including:  
*Ugt86Dd*, *Ugt86Di*, and *Ugt86Dc*

Interaction:  $P < 10^{-8}$

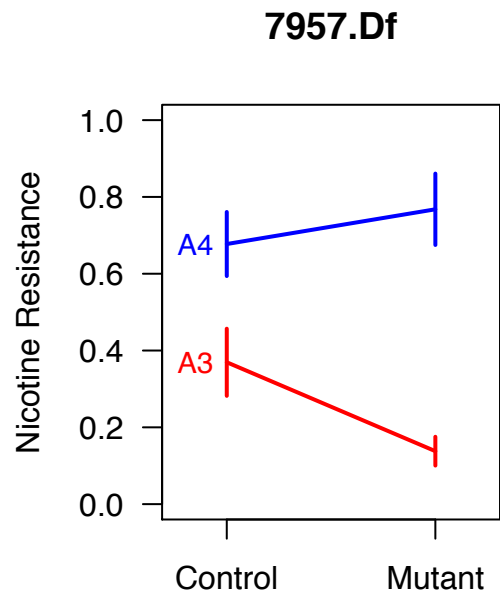

BDSC: 7958  
Exelixis Deficiency  
*w<sup>1118</sup>*; Df(3R)Exel8152/TM6B, Tb<sup>1</sup>

Deletes: 3R:11,154,150..11,200,280  
11 protein-coding genes including:  
*Ugt86Dc*, *Ugt86Da*, *Ugt86Dg*,  
*Ugt86De*, *Ugt35b*, *Ugt35a*,  
*Ugt86Dj*, and *Ugt86Dh*

Interaction:  $P < 10^{-6}$

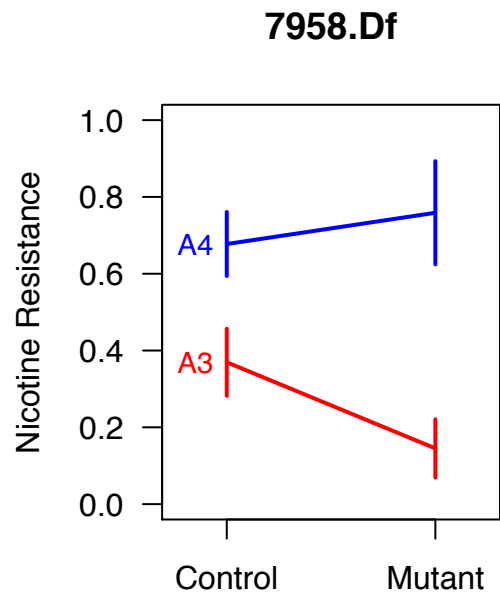

BDSC: 9083  
DrosDel Deficiency  
*w<sup>1118</sup>*; Df(3R)ED5506/TM6C, *cu<sup>1</sup>* Sb<sup>1</sup>

Deletes: 3R:10,884,998..11,172,748  
19 protein-coding genes including:  
*Ugt86Dd*, *Ugt86Di*, *Ugt86Dc*,  
*Ugt86Da*, *Ugt86Dg*, *Ugt86De*,  
*Ugt35b*, and *Ugt35a*

Interaction:  $P < 10^{-9}$

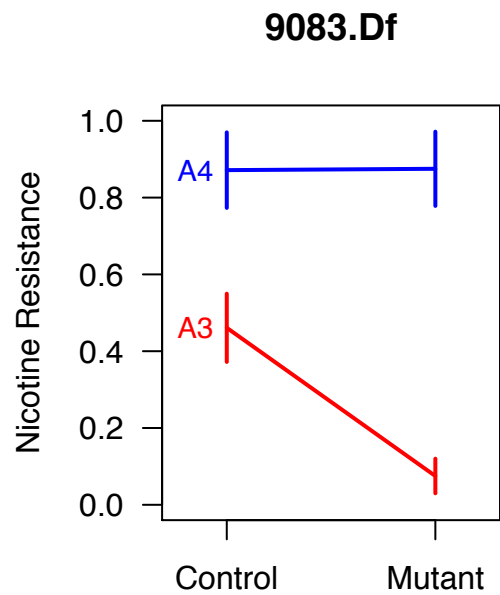

Minos Insertion Mutants (2L)

BDSC: 23530  
Minos Insertion  
 $w^{1118}; Mi\{ET1\}Cyp28d1^{MB03293}$

Insertion: 2L:5,211,244  
Inserts within *Cyp28d1*  
coding exon

Interaction:  $P < 10^{-5}$

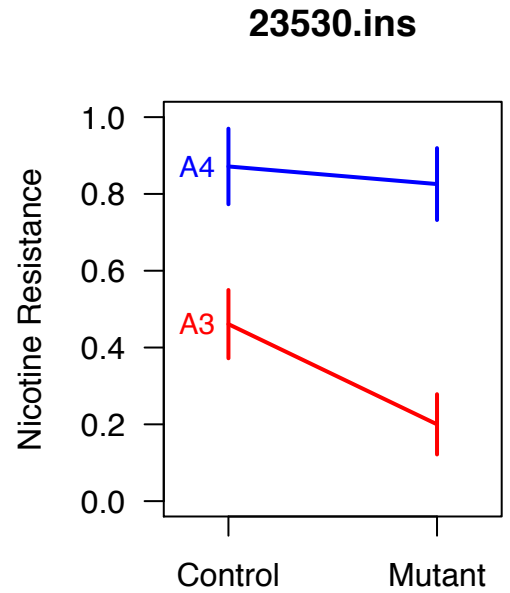

BDSC: 23587  
Minos Insertion  
 $w^{1118}; Mi\{ET1\}Cyp28d2^{MB02776}$

Insertion: 2L:5,208,263  
Inserts within *Cyp28d2*  
coding exon

Interaction:  $P < 10^{-14}$

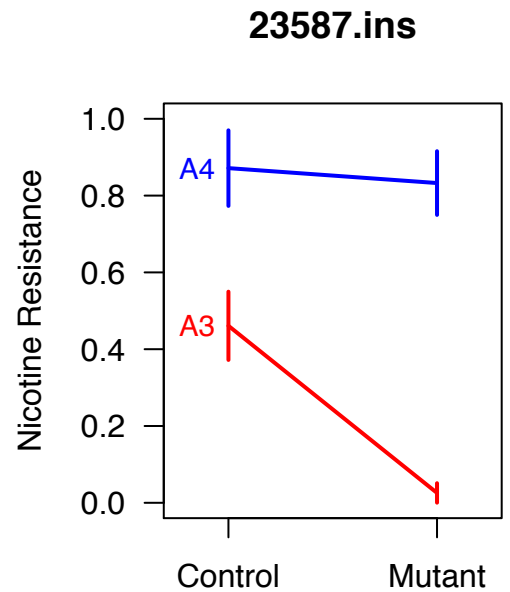

## Minos Insertion Mutants (3R)

BDSC: 24834  
Minos Insertion  
 $w^{1118}; Mi\{ET1\}Ugt86Dj^{MB04890}$

Insertion: 3R:11,173,796  
Inserts within *Ugt86Dj*  
coding exon

Interaction:  $P < 0.001$

Note that there is a larger difference between founder alleles in the 'Control' background than in the 'Mutant' background. This observation is not consistent with an allelic failure to complement, and more likely indicates epistasis.

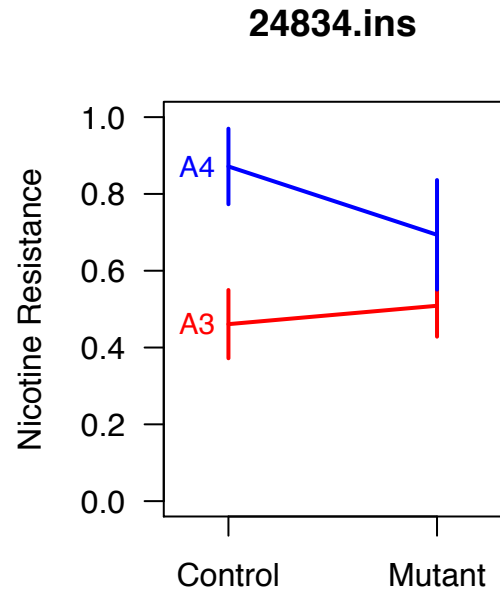

BDSC: 27861  
Minos Insertion  
 $w^{1118}; Mi\{ET1\}Ugt86Dh^{MB11311}$

Insertion: 3R:11,177,673  
Inserts within the 3'UTR of one  
of the two *Ugt86Dh* isoforms

Interaction:  $P < 0.01$

Note that there is a larger difference between founder alleles in the 'Control' background than in the 'Mutant' background. This observation is not consistent with an allelic failure to complement, and more likely indicates epistasis.

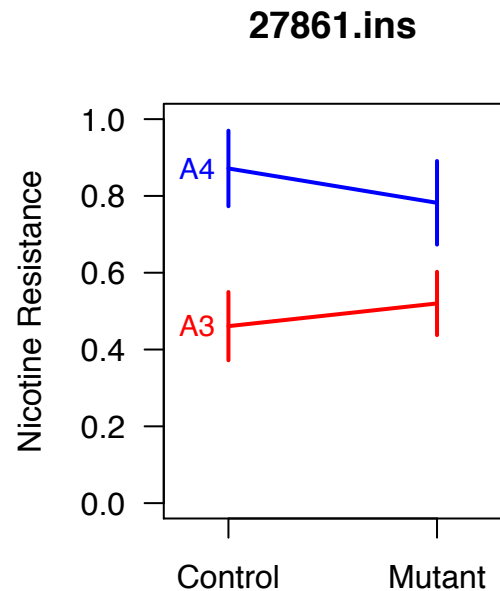

Supplement: 311FigureS2.pdf [file 311FigureS2.pdf]
