# Supplementary material for: Naturally Segregating Variation at Ugt86Dd Contributes to Nicotine Resistance in Drosophila melanogaster
Source: PubMed Central journal article supplement (PMC5586381; doi:10.1534/genetics.117.300058), 2017-07-26

**Figure S1** Sequence of the *Ugt86Dd* 22-bp InDel region in the 15 DSPR founder strains. The stretch of DNA is within coding exon 2 of the *Ugt86Dd* gene, and the genome coordinates are relative to Release 6 of the *Drosophila melanogaster* reference. SNPs in red are synonymous. The 22-bp deletion in founders A3, B6, B7, and AB8 leads to a short incorrect amino acid sequence (blue) followed by a premature stop codon. The sequence highlighted in yellow is the guide RNA sequence used to generate double-strand breaks ("DSB") via CRISPR/Cas9 editing in A4.

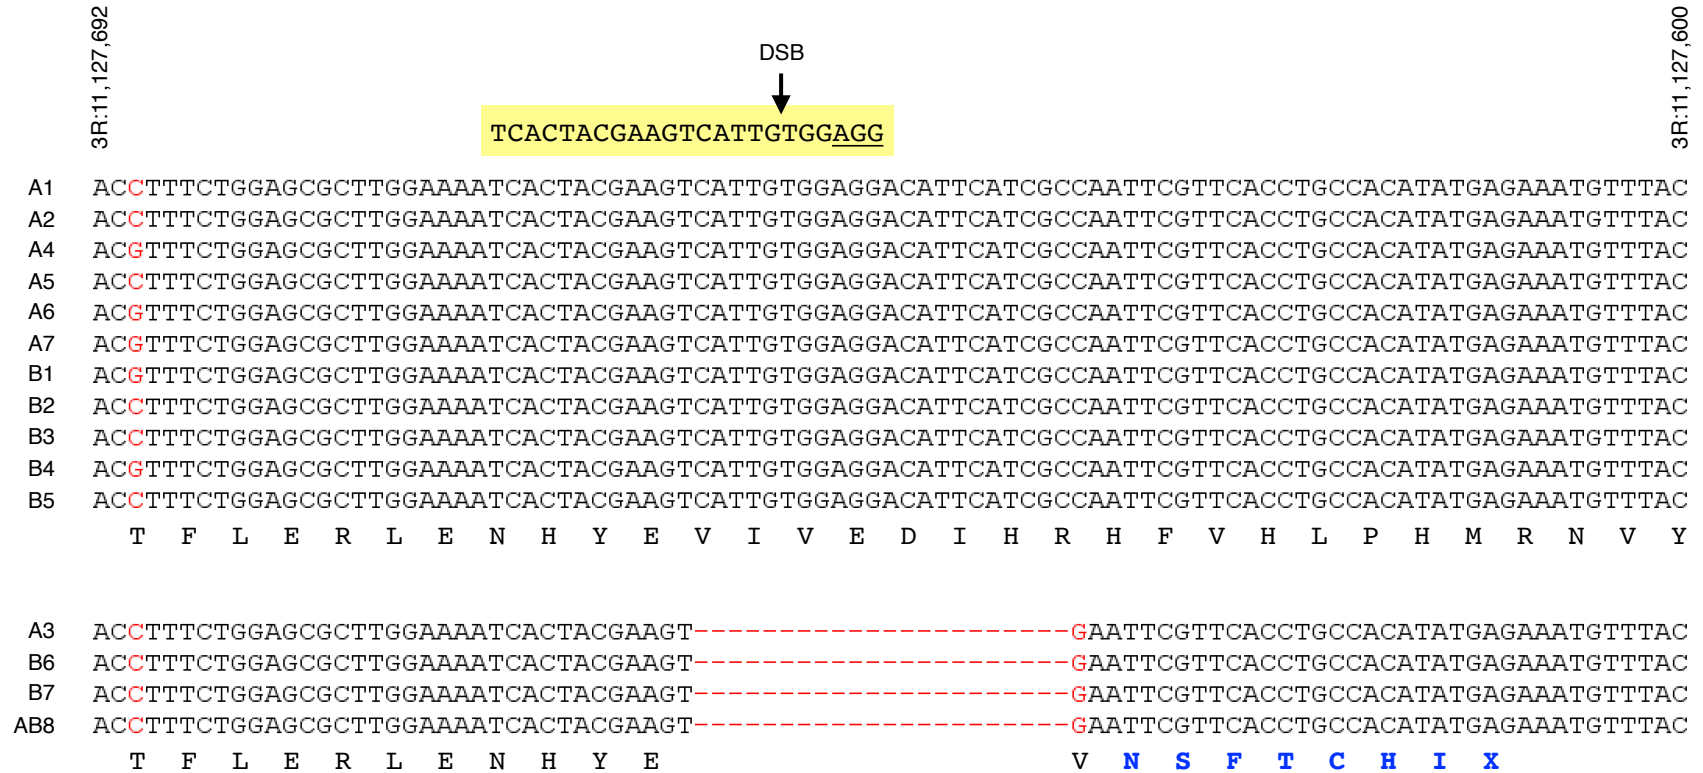

Supplement: 311FigureS1.pdf [file 311FigureS1.pdf]
