# Supplementary material for: Naturally Segregating Variation at Ugt86Dd Contributes to Nicotine Resistance in Drosophila melanogaster
Source: PubMed Central journal article supplement (PMC5586381; doi:10.1534/genetics.117.300058), 2017-07-26
Supplement: 311FileS2.pdf [file 311FileS2.pdf]

**File S2** The set of pB2 DSPR RILs used for RNAseq. RIL IDs are given as the standard DSPR nomenclature (see FlyRILs.org). The nicotine resistance phenotype data is taken directly from that presented in Marriage et al. (2014). The allele present in each RIL at the *Ugt86Dd* 22-bp InDel (In = insertion, Del = 22-bp deletion) is based on direct genotyping of the DSPR founder strains, and high confidence estimates of the founder contribution at the *Ugt86Dd* gene region in each RIL.

High resistance RILs ( $n = 6$ )

| <u>RIL ID</u> | <u>Pheno</u> | <u>InDel Allele</u> |
|---------------|--------------|---------------------|
| 22098         | 0.80         | In                  |
| 22110         | 0.87         | In                  |
| 22112         | 0.83         | In                  |
| 22156         | 0.83         | In                  |
| 22290         | 0.77         | Del                 |
| 22342         | 0.77         | In                  |

Low resistance RILs ( $n = 12$ )

| <u>RIL ID</u> | <u>Pheno</u> | <u>InDel Allele</u> |
|---------------|--------------|---------------------|
| 22045         | 0.00         | Del                 |
| 22097         | 0.00         | Del                 |
| 22124         | 0.00         | Del                 |
| 22127         | 0.00         | Del                 |
| 22128         | 0.00         | Del                 |
| 22163         | 0.00         | Del                 |
| 22226         | 0.00         | Del                 |
| 22232         | 0.00         | Del                 |
| 22281         | 0.00         | Del                 |
| 22301         | 0.00         | Del                 |
| 22317         | 0.00         | Del                 |
| 22322         | 0.00         | Del                 |
