# Supplementary material for: Naturally Segregating Variation at Ugt86Dd Contributes to Nicotine Resistance in Drosophila melanogaster
Source: PubMed Central journal article supplement (PMC5586381; doi:10.1534/genetics.117.300058), 2017-07-26
Supplement: 311FileS4.pdf [file 311FileS4.pdf]

**File S4** Sequences of all CRISPR/Cas9-generated mutations in *Ugt86Dd*. For each of the 16 mutations we give the DNA sequence, and the anticipated resulting amino acid sequence. The genotype IDs match those provided in the remainder of the study.

### Wildtype *Ugt86Dd* sequence

```
CGAACCGATCGGATGACCTTTCTGGAGCGCTTGGAAAATCACTACGAAGTCATTGTGGAGGACATTCATCGCCATTTTC
R T D R M T F L E R L E N H Y E V I V E D I H R H F
GTTACCTGCCACATATGAGAAATGTTTACAAAAAGTATTTCCCGAATGCAAAGAAAACCCTGGAGGAAGTCATGGAT
V H L P H M R N V Y K K Y F P N A K K T L E E V M D
```

### CRISPR/Cas9 mutations leading to a premature stop codon

**Genotype ID = PremStop[3F.4F]**

**Genotype ID (following chromosome substitution) = A4-*Ugt86Dd*<sup>Del1</sup>**

**Mutation = 1bp (T) deleted**

```
CGAACCGATCGGATGACCTTTCTGGAGCGCTTGGAAAATCACTACGAAGTCATTGGGAGGACATTCATCGCCATTTTCG
R T D R M T F L E R L E N H Y E V I G R T F I A I S
TTCACCTGCCACATATGA
F T C H I X
```

**Genotype ID = PremStop[8F.3M]**

**Mutation = 1bp (G) deleted**

```
CGAACCGATCGGATGACCTTTCTGGAGCGCTTGGAAAATCACTACGAAGTCATTTGGAGGACATTCATCGCCATTTTCG
R T D R M T F L E R L E N H Y E V I T R T F I A I S
TTCACCTGCCACATATGA
F T C H I X
```

**Genotype ID = PremStop[1M.2F]**

**Mutation = 2bp (TG) deleted**

```
CGAACCGATCGGATGACCTTTCTGGAGCGCTTGGAAAATCACTACGAAGTCATTGGAGGACATTCATCGCCATTTTCGT
R T D R M T F L E R L E N H Y E V I G G H S S P F R
TCACCTGCCACATATGAGAAATGTTTACAAAAAGTATTTCCCGAATGCAAAGAAAACCCTGGAGGAAGTCATGGATAG
S P A T T E K C L Q K V F P E C K E N P G G S H G X
```

**Genotype ID = PremStop[7F.4F]**

**Mutation = 4bp (ATTG) deleted**

```
CGAACCGATCGGATGACCTTTCTGGAGCGCTTGGAAAATCACTACGAAGTCTGGAGGACATTCATCGCCATTTTCGTTTC
R T D R M T F L E R L E N H Y E V T R T F I A I S F
ACCTGCCACATATGA
T C H I X
```

**Genotype ID = PremStop[13M.5F]**

**Mutation = 4bp (TCAT) deleted**

```
CGAACCGATCGGATGACCTTTCTGGAGCGCTTGGAAAATCACTACGAAGTGTGGAGGACATTCATCGCCATTTTCGTTTC
R T D R M T F L E R L E N H Y E V W R T F I A I S F
ACCTGCCACATATGA
T C H I X
```

**Genotype ID = PremStop[19F.4F]**

Mutation = 5bp (GTGGA) deleted

CGAACCGATCGGATGACCTTTCTGGAGCGCTTGGAAAATCACTACGAAGTCATTGGACATTCATCGCCATTTTCGTTCA  
R T D R M T F L E R L E N H Y E V I G H S S P F R S  
CCTGCCACATATGAGAAATGTTTACAAAAAGTATTTCCCGAATGCAAAGAAAACCCTGGAGGAAGTCATGGATAG  
P A T T E K C L Q K V F P E C K E N P G G S H G X

**Genotype ID = PremStop[8F.2F]**

Mutation = 8bp (GTGGAGGA) deleted

CGAACCGATCGGATGACCTTTCTGGAGCGCTTGGAAAATCACTACGAAGTCATTTCATTTCATCGCCATTTTCGTTACCT  
R T D R M T F L E R L E N H Y E V I H S S P F R S P  
GCCACATATGAGAAATGTTTACAAAAAGTATTTCCCGAATGCAAAGAAAACCCTGGAGGAAGTCATGGATAG  
A T T E K C L Q K V F P E C K E N P G G S H G X

**Genotype ID = PremStop[13M.2M]**

Genotype ID (following chromosome substitution) = **A4-Ugt86Dd<sup>Del11</sup>**

Mutation = 11bp (AGTCATTGTGG) deleted

CGAACCGATCGGATGACCTTTCTGGAGCGCTTGGAAAATCACTACGAAGGACATTCATCGCCATTTTCGTTACCTGCC  
R T D R M T F L E R L E N H Y E G L S S P F R S P A  
ACATATGAGAAATGTTTACAAAAAGTATTTCCCGAATGCAAAGAAAACCCTGGAGGAAGTCATGGATAG  
T T E K C L Q K V F P E C K E N P G G S H G X

**Genotype ID = PremStop[6M.4F]**

Mutation = 15bp (ACGAAGTCATTGTGG) deleted

CGAACCGATCGGATGACCTTTCTGGAGCGCTTGGAAAATCACTAG  
R T D R M T F L E R L E N H X

**Genotype ID = PremStop[1F.2F]**

Mutation = Overall 1bp insert (G->CA)

CGAACCGATCGGATGACCTTTCTGGAGCGCTTGGAAAATCACTACGAAGTCATTTCATGGAGGACATTCATCGCCATTT  
R T D R M T F L E R L E N H Y E V I H G G H S S P F  
CGTTACCTGCCACATATGAGAAATGTTTACAAAAAGTATTTCCCGAATGCAAAGAAAACCCTGGAGGAAGTCATGGA  
R S P A T T E K C L Q K V F P E C K E N P G G S H G  
TAG  
X

**Genotype ID = PremStop[13F.3F]**

Mutation = Overall 5bp insert (G->CATTCA)

CGAACCGATCGGATGACCTTTCTGGAGCGCTTGGAAAATCACTACGAAGTCATTTCATTTCATGGAGGACATTCATCGCC  
R T D R M T F L E R L E N H Y E V I H S W R T F I A  
ATTTTCGTTACCTGCCACATATGA  
I S F T C H I X

**Genotype ID = PremStop[1M.2M]**

Mutation = Overall 8bp insert (TGGA->ACTTCATCGAAT)

CGAACCGATCGGATGACCTTTCTGGAGCGCTTGGAAAATCACTACGAAGTCATTGACTTCATCGAATGGACATTCATC  
R T D R M T F L E R L E N H Y E V I D F I E W T F I  
GCCATTTTCGTTACCTGCCACATATGA  
A I S F T C H I X

**Genotype ID = PremStop[13M.3F]**

Mutation = Overall 4bp deleted (GTGGAGGA->CATT)

```
CGAACCGATCGGATGACCTTTCTGGAGCGCTTGGAAAATCACTACGAAGTCATTTCATTTCATTTCATCGCCATTTTCGTTTC
R T D R M T F L E R L E N H Y E V I H S F I A I S F
ACCTGCCACATATGA
T C H I X
```

**CRISPR/Cas9 mutations leading to an amino acid sequence change**

**Genotype ID = AAChange[6M.3M]**

Mutation = 3bp (TTG) deleted, removes 1 AA, changes 1 AA

```
CGAACCGATCGGATGACCTTTCTGGAGCGCTTGGAAAATCACTACGAAGTCATGGAGGACATTTCATCGCCATTTTC
R T D R M T F L E R L E N H Y E V M E D I H R H F
```

**Genotype ID = AAChange[13M.4M]**

Mutation = 6bp (GTGGAG) deleted, removes 2 AA

```
CGAACCGATCGGATGACCTTTCTGGAGCGCTTGGAAAATCACTACGAAGTCATTGACATTTCATCGCCATTTTC
R T D R M T F L E R L E N H Y E V I D I H R H F
```

**Genotype ID = AAChange[6F.1M]**

Mutation = Overall 6bp insert (TG->GGAGGACA), adds 2 AA, changes 2 AA

```
CGAACCGATCGGATGACCTTTCTGGAGCGCTTGGAAAATCACTACGAAGTCATGGAGGACATGGAGGACATTTCATCGC
R T D R M T F L E R L E N H Y E V M E D M E D I H R
```

**Non-edited chromosomes passed through CRISPR/Cas9 editing pipeline**

All 7 have wildtype sequence.

**Genotype ID = UnEdit[1F.1F]**

**Genotype ID (following chromosome substitution) = A4-Ugt86Dd<sup>w<sup>t</sup></sup>**

**Genotype ID = UnEdit[2F.4F]**

**Genotype ID = UnEdit[3M.5F]**

**Genotype ID = UnEdit[7F.4M]**

**Genotype ID = UnEdit[11M.3M]**

**Genotype ID = UnEdit[13F.2M]**

**Genotype ID = UnEdit[13F.5F]**
