# Supplementary material for: Naturally Segregating Variation at Ugt86Dd Contributes to Nicotine Resistance in Drosophila melanogaster
Source: PubMed Central journal article supplement (PMC5586381; doi:10.1534/genetics.117.300058), 2017-07-26
Supplement: 311TableS1.pdf [file 311TableS1.pdf]

**Table S1** Phenotypes of multiple *Ugt86Dd* CRISPR/Cas9-derived homozygous third chromosome genotypes.

| Genotype code <sup>a</sup> | Mean viability (no-drug) <sup>b</sup> | Mean nicotine resistance <sup>b</sup> | Difference <sup>b</sup> | P-value <sup>c</sup> |
|----------------------------|---------------------------------------|---------------------------------------|-------------------------|----------------------|
| PremStop[3F.4F]            | 0.82                                  | 0.24                                  | -0.58                   | < 0.001              |
| PremStop[8F.3M]            | 0.82                                  | 0.43                                  | -0.39                   | < 0.01               |
| PremStop[1M.2F]            | 0.69                                  | 0.39                                  | -0.30                   | < 0.01               |
| PremStop[7F.4F]            | 0.79                                  | 0.33                                  | -0.46                   | < 0.001              |
| PremStop[13M.5F]           | 0.85                                  | 0.52                                  | -0.33                   | < 0.05               |
| PremStop[19F.4F]           | 0.74                                  | 0.13                                  | -0.61                   | < 0.001              |
| PremStop[8F.2F]            | 0.70                                  | 0.20                                  | -0.50                   | < 0.001              |
| PremStop[13M.2M]           | 0.73                                  | 0.36                                  | -0.37                   | < 0.01               |
| PremStop[6M.4F]            | 0.75                                  | 0.39                                  | -0.36                   | < 0.01               |
| PremStop[1F.2F]            | 0.75                                  | 0.38                                  | -0.37                   | < 0.001              |
| PremStop[13F.3F]           | 0.75                                  | 0.52                                  | -0.23                   | < 0.01               |
| PremStop[1M.2M]            | 0.74                                  | 0.36                                  | -0.38                   | < 0.001              |
| PremStop[13M.3F]           | 0.83                                  | 0.49                                  | -0.34                   | < 0.001              |
| AAchange[6M.3M]            | 0.83                                  | 0.48                                  | -0.35                   | < 0.001              |
| AAchange[13M.4M]           | 0.83                                  | 0.54                                  | -0.29                   | < 0.001              |
| AAchange[6F.1M]            | 0.79                                  | 0.26                                  | -0.53                   | < 0.001              |
| UnEdit[1F.1F]              | 0.77                                  | 0.77                                  | 0.00                    | ns                   |
| UnEdit[2F.4F]              | 0.74                                  | 0.77                                  | 0.03                    | ns                   |
| UnEdit[3M.5F]              | 0.68                                  | 0.71                                  | 0.03                    | ns                   |
| UnEdit[7F.4M]              | 0.74                                  | 0.72                                  | -0.02                   | ns                   |
| UnEdit[11M.3M]             | 0.78                                  | 0.75                                  | -0.03                   | ns                   |
| UnEdit[13F.2M]             | 0.79                                  | 0.77                                  | -0.02                   | ns                   |
| UnEdit[13F.5F]             | 0.77                                  | 0.74                                  | -0.03                   | ns                   |

<sup>a</sup> "PremStop" means the lesion generates a premature stop codon in *Ugt86Dd*, "AAchange" means the lesion alters the amino acid sequence, while "UnEdit" means that the gene was un-edited, but the genotype was otherwise passed through the same injection/crossing scheme as the edited alleles. The numbers in square brackets are arbitrary lab identifiers. File S4 provides the exact sequence of each lesion.

<sup>b</sup> Each genotype was tested across 5 no-drug and 6 nicotine-containing vials, and the values presented are the means across replicate vials. The difference (nicotine minus no-drug) makes clear the extent, and direction of the change between treatments.

<sup>c</sup> Provides the *P*-value associated with a *t*-test comparing the no-drug and nicotine treatments for each genotype.
