# Supplementary material for: Naturally Segregating Variation at Ugt86Dd Contributes to Nicotine Resistance in Drosophila melanogaster
Source: PubMed Central journal article supplement (PMC5586381; doi:10.1534/genetics.117.300058), 2017-07-26
Supplement: 311TableS2.pdf [file 311TableS2.pdf]

**Table S2** Estimate of *Ugt86Dd* InDel allele frequency in natural populations of *D. melanogaster*.

| <b>SRA accession</b> <sup>a</sup> | <b>Population</b> <sup>a</sup> | <b>Num. autosomes sampled</b> <sup>a</sup> | <b>Read depth</b> <sup>a</sup> | <b>Num. insertion alleles</b> <sup>b</sup> | <b>Num. deletion alleles</b> <sup>c</sup> | <b>Frequency</b> |
|-----------------------------------|--------------------------------|--------------------------------------------|--------------------------------|--------------------------------------------|-------------------------------------------|------------------|
| SRX661832                         | Florida                        | 78                                         | 69                             | 55                                         | 2                                         | 0.035            |
| SRX661833                         | Florida                        | 96                                         | 42                             | 32                                         | 0                                         | 0.000            |
| SRX661834                         | Georgia                        | 102                                        | 118                            | 99                                         | 1                                         | 0.010            |
| SRX661835                         | S. Carolina                    | 96                                         | 99                             | 98                                         | 2                                         | 0.020            |
| SRX661837                         | Pennsylvania                   | 110                                        | 216                            | 172                                        | 0                                         | 0.000            |
| SRX661838                         | Pennsylvania                   | 148                                        | 78                             | 61                                         | 0                                         | 0.000            |
| SRX661839                         | Pennsylvania                   | 232                                        | 29                             | 24                                         | 3                                         | 0.111            |
| SRX661840                         | Pennsylvania                   | 66                                         | 89                             | 78                                         | 1                                         | 0.013            |
| SRX661841                         | Pennsylvania                   | 150                                        | 80                             | 63                                         | 1                                         | 0.016            |
| SRX661842                         | Pennsylvania                   | 94                                         | 85                             | 72                                         | 5                                         | 0.065            |
| SRX661843                         | Pennsylvania                   | 100                                        | 81                             | 51                                         | 3                                         | 0.056            |
| SRX661844                         | Maine                          | 172                                        | 105                            | 60                                         | 0                                         | 0.000            |
| SRX661845                         | Maine                          | 150                                        | 25                             | 15                                         | 0                                         | 0.000            |
| <b>Total</b>                      |                                |                                            |                                | 880                                        | 18                                        | 0.020            |

<sup>a</sup> These data are taken directly from Supplemental Table 1 from Bergland et al. (2014).

<sup>b</sup> The number of reads in the raw FASTQ file containing the sequence ATTGTGGAGGACATTCATCG counted by the UNIX grep function. This sequence corresponds to the central 20bp of the insertion allele at the 22bp InDel. Instances of this sequence appearing in both reads of a paired-end sequenced fragment were counted just once.

<sup>c</sup> The number of reads in the raw FASTQ file containing the sequence GAACGAATTCACCTTCGTAGT counted by the UNIX grep function. This sequence corresponds to the 10bp of sequence either side of the insertion allele concatenated together. Instances of this sequence appearing in both reads of a paired-end sequenced fragment were counted just once.
